# Supplementary material for: Phototransduction and circadian entrainment are the key pathways in the signaling mechanism for the baculovirus induced tree-top disease in the lepidopteran larvae
Source: PubMed Central journal article supplement (PMC6277413; doi:10.1038/s41598-018-35885-4), 2018-12-03
Supplement: 41598_2018_35885_MOESM1_ESM.pdf [file 41598_2018_35885_MOESM1_ESM.pdf]

**Phototransduction and circadian entrainment are the key pathways in the signaling mechanism for the baculovirus induced tree-top disease in the lepidopteran larvae**

Upendra Raj Bhattarai, Fengjiao Li, Mandira Katuwal Bhattarai, Abolfazl Masoudi, Dun Wang \*

State Key Laboratory of Crop Stress Biology for Arid Areas, Northwest A&F University, Yangling, Shaanxi, 712100, P. R. China

\*corresponding author [wanghande@yahoo.com](mailto:wanghande@yahoo.com), [dunwang@foxmail.com](mailto:dunwang@foxmail.com)

**Supplementary Information**

**Supplementary Table S1.** Annotation summary of unigenes from illumine sequencing data to different databases.

| Databases                          | Number of Unigenes | Percentage (%) |
|------------------------------------|--------------------|----------------|
| Annotated in NR                    | 38561              | 22.79          |
| Annotated in NT                    | 21610              | 12.77          |
| Annotated in KO                    | 17632              | 10.42          |
| Annotated in SwissProt             | 36057              | 21.31          |
| Annotated in PFAM                  | 41730              | 24.66          |
| Annotated in GO                    | 41898              | 24.76          |
| Annotated in KOG                   | 26371              | 15.58          |
| Annotated in all Databases         | 5408               | 3.19           |
| Annotated in at least one Database | 61053              | 36.08          |
| Total Unigenes                     | 169188             | 100            |

**Supplementary Table S2.** List of primers used in the study.

| Name of Primers | Sequence (5'-3')     |
|-----------------|----------------------|
| JunF            | TAAAGAGCACCGGGTCAGTC |
| JunR            | CGTATGCGAGACGCAAGAAC |
| DdcF            | GGACCGCTGGAGCTATTGAG |
| DdcR            | CCGGCACATCTTATGCAAGC |
| GabaF           | CTGCGAATTTTCTCGCCCTC |
| GabaR           | AGCTGATTGCGTCATTGCTT |
| GlulF           | GTTAGGTGAGTTCGCCAGCA |
| GlulR           | ACTGCACGGGACAGACATAC |
| Myh6F           | GGTAGCCTTGTCCTGCTCTG |
| Myh6R           | GAAGGCTGACCTCGAGACAC |

|        |                       |
|--------|-----------------------|
| ActbF  | CCATACCGACCATCACACC   |
| ActbR  | ACCACACACAAACGCCAAA   |
| Hspa1F | TCCAGGTATTTCGAGGGTGAG |
| Hspa1R | CCTTGTCGTTTGTGATGGTG  |
| PepckF | GCGATCCACTTCGTACCATT  |
| PepckR | TATCGTTTACGGCCTTTTGG  |
| AntF   | AGAGAGAGGCAACACCCTCA  |
| AntR   | TCGTCGTTGACTTCCTGATG  |
| TimF   | GGAGGGAGTCCGATGAGAGT  |
| TimR   | GTACCGTATCCGCAATCCGA  |
| PerF   | ACATTCTTGCGGGCGAAAAC  |
| PerR   | TTGGTTGGTAATCCGCTGCT  |
| GapdhF | ACTGCCACCCAAAAGACTGT  |
| GapdhR | CAGTGAGGTCGACAACGGAT  |

### SPECIES DISTRIBUTION

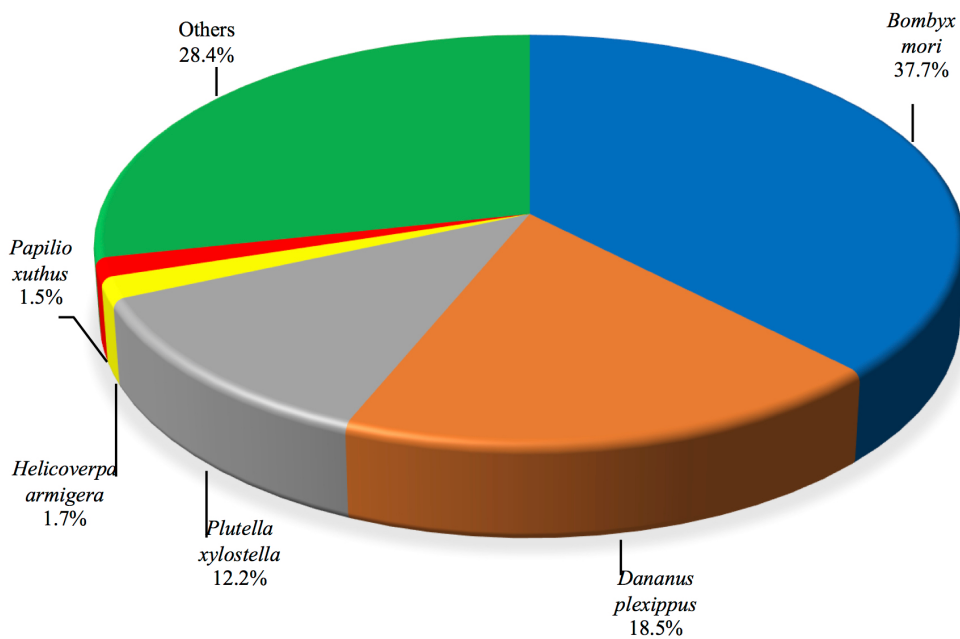

**Supplementary Figure S1.** Species distribution of the BLASTx results from the transcriptome annotations, numbers showed similarity percentage of genes to that species.

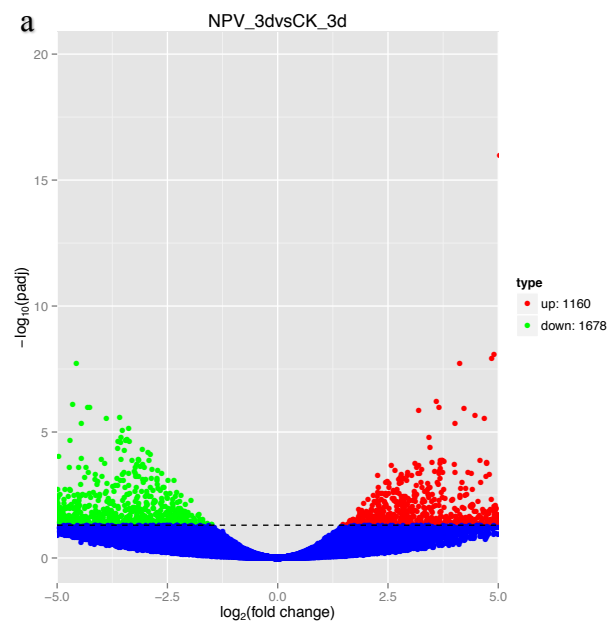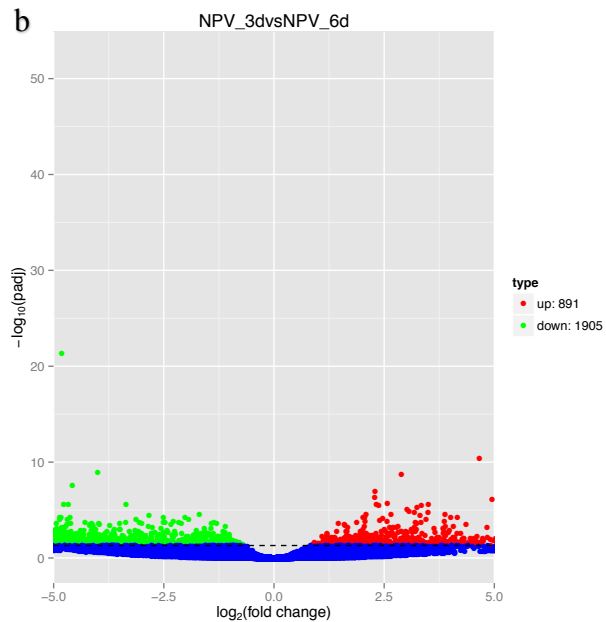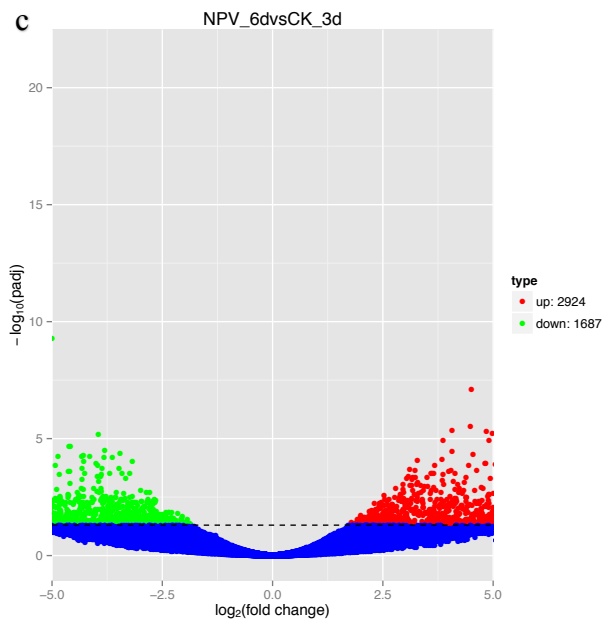

**Supplementary Figure S2:** Volcano plot from differential expression analysis showing the relative expression levels of transcripts in pairwise comparison of samples (a) NPV\_3d vs CK\_3d, (b) NPV\_3d vs NPV\_6d, (c) NPV\_6d vs CK\_3d. The x-axis represents the log<sub>2</sub> of the expression fold change for each transcript. The y-axis represents the negative log<sub>10</sub> of the adjusted *P*-value of the Fisher's Exact test. Red and green points represent statistically significantly ( $P_{adj} < 0.05$ ) up and down regulated genes respectively in pairwise comparisons.

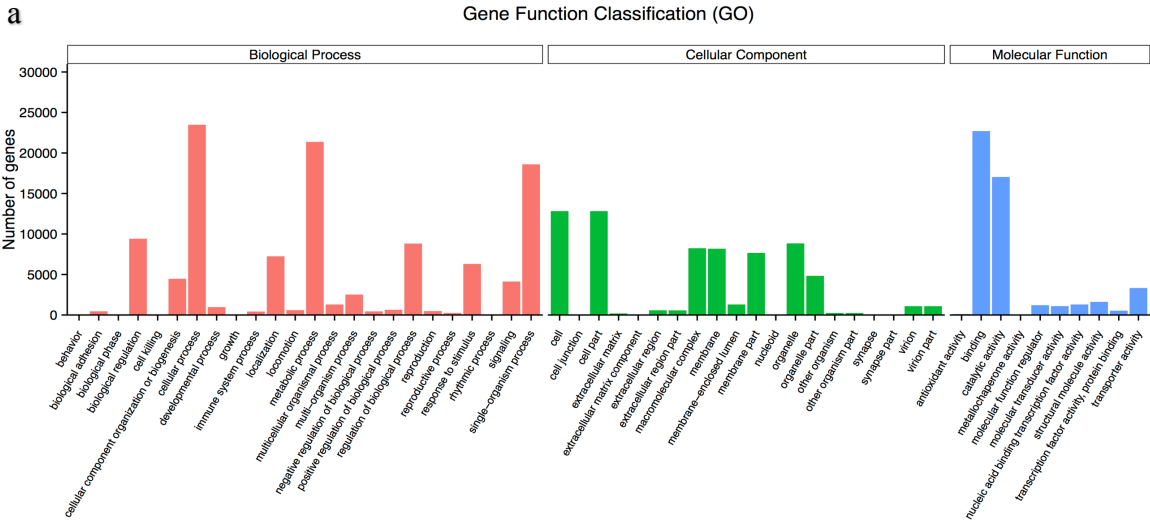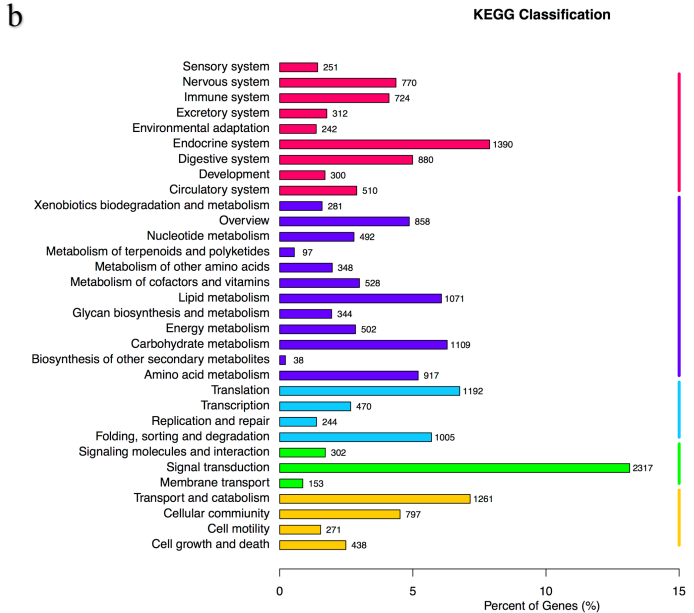

**Supplementary Figure S3:** Unigene’s functional annotation and classification details. (a) Gene Ontology (GO) annotation and classification GO terms are summarized in three main categories of biological process, cellular component, and molecular function. Different GO terms are presented in X-axis; Y-axis represents the number of genes enriched. (b) KEGG annotation and pathway classification of unigenes, X-axis represents the percentage of genes involved. Left Y-axis is enlisted with different KEGG pathways, number of genes associated with each pathway are listed on top of each histogram. KEGG pathways are categorized in 5 different categories presented in right Y-axis: A stand for Cellular process category, B for Environmental Information processing, C for Genetic information processing, D for Metabolism and E for Organismal system category.

a

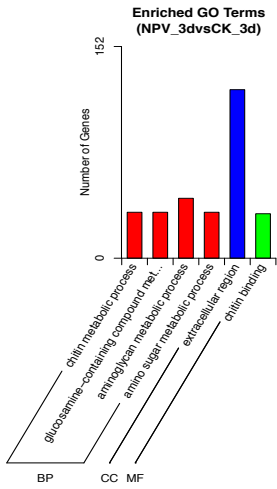

**Supplementary Figure S4.** Gene Ontology (GO) term distribution of the GO enrichment analysis of differentially expressed genes between samples (a) NPV\_3d vs CK\_3d; (b) NPV\_3d vs NPV\_6d; (c) NPV\_6d vs CK\_3d. GO terms are shown within the divisions of Biological Process (BP), Cellular Component (CC), and Molecular Function (MF) categories. Column height represents the number of enriched unigenes for the GO term.

b

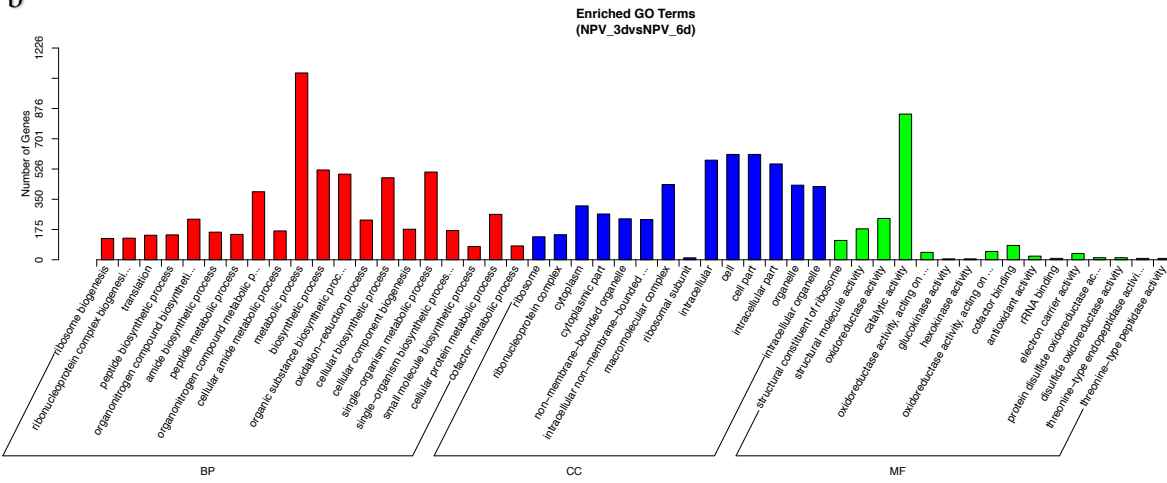

c

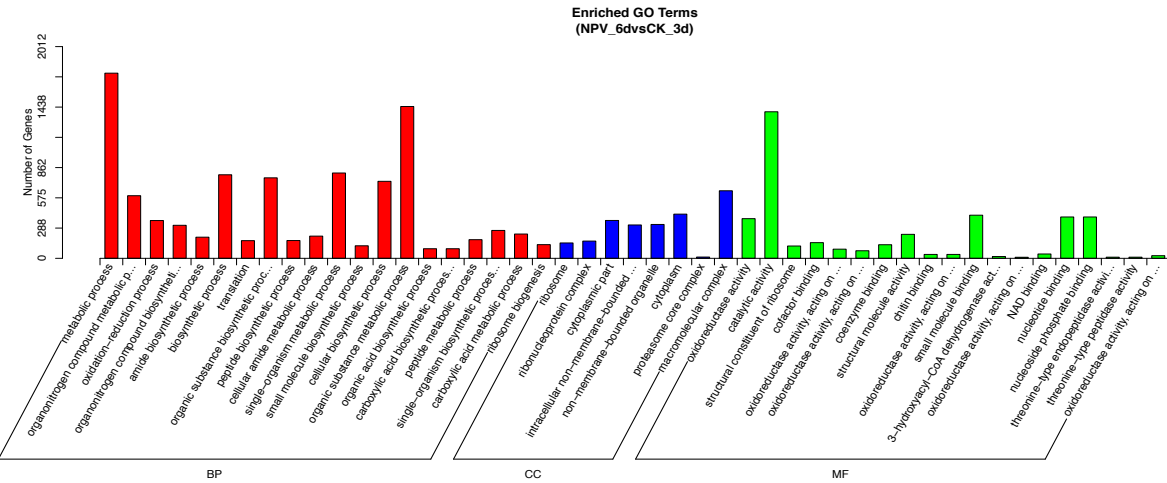

**a**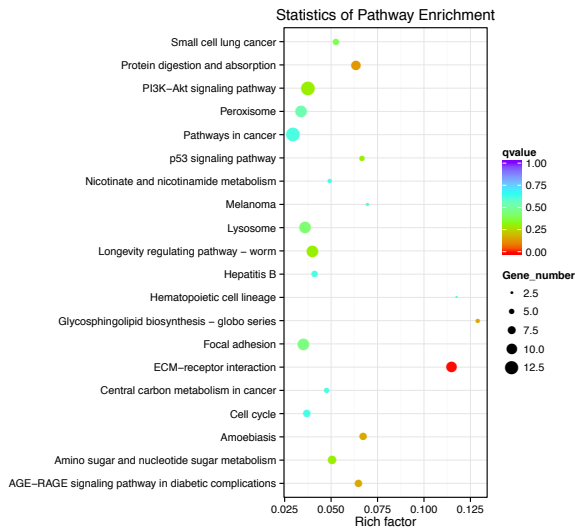**b**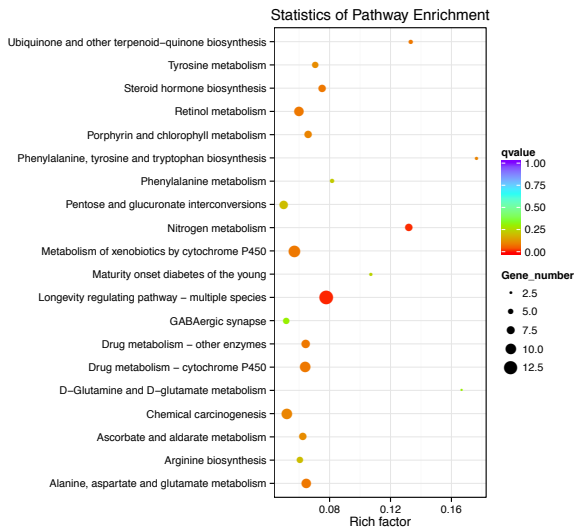**c**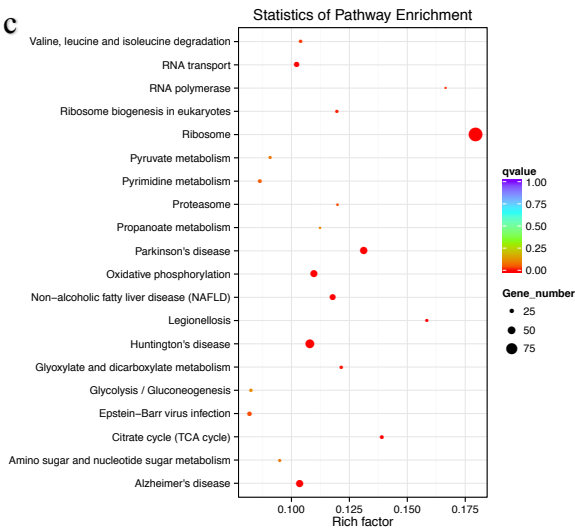**d**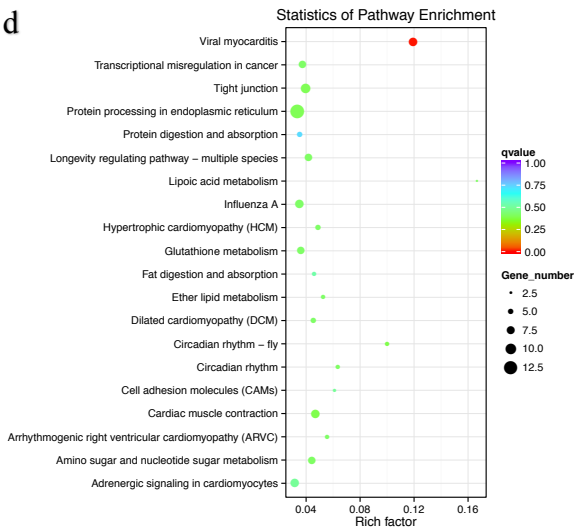**e**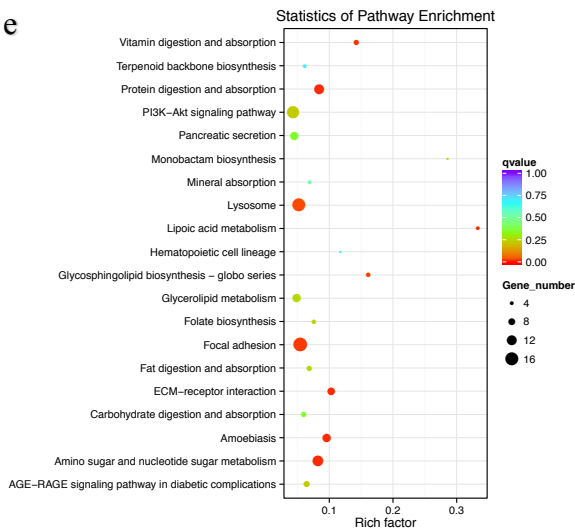**f**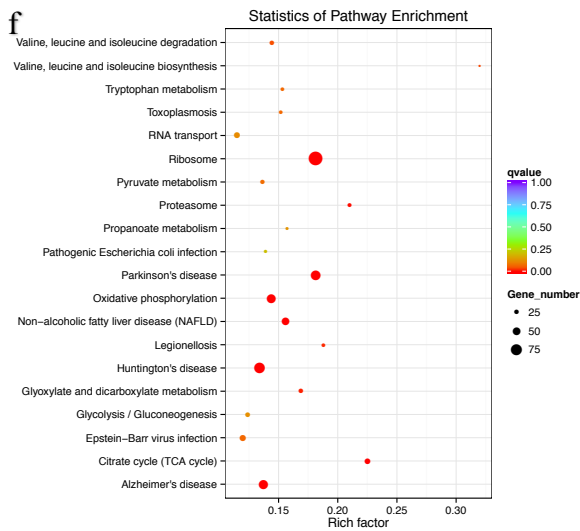

**Supplementary Figure S5.** Scatterplot of KEGG Pathway enrichment analysis. (a) NPV\_3d vs CK\_3d down regulated; (b) NPV\_3d vs CK\_3d up regulated; (c) NPV\_3d vs NPV\_6d down regulated; (d) NPV\_3d vs NPV\_6d up regulated; (e) NPV\_6d vs CK\_3d down regulated; (f) NPV\_6d vs CK\_3d up regulated. The degree of KEGG enrichment is measured by Rich factor, q-value and the number of genes enriched in this pathway. Rich factor refers to the ratio of the DEGs number in the pathway and the number of all genes annotated in the pathway. q-value is the *P*-value after normalization and its range is (0,1). The top20 significantly DEGs enriched pathways are displayed in the report. If the enriched pathways are less than 20, all enriched pathways are displayed.

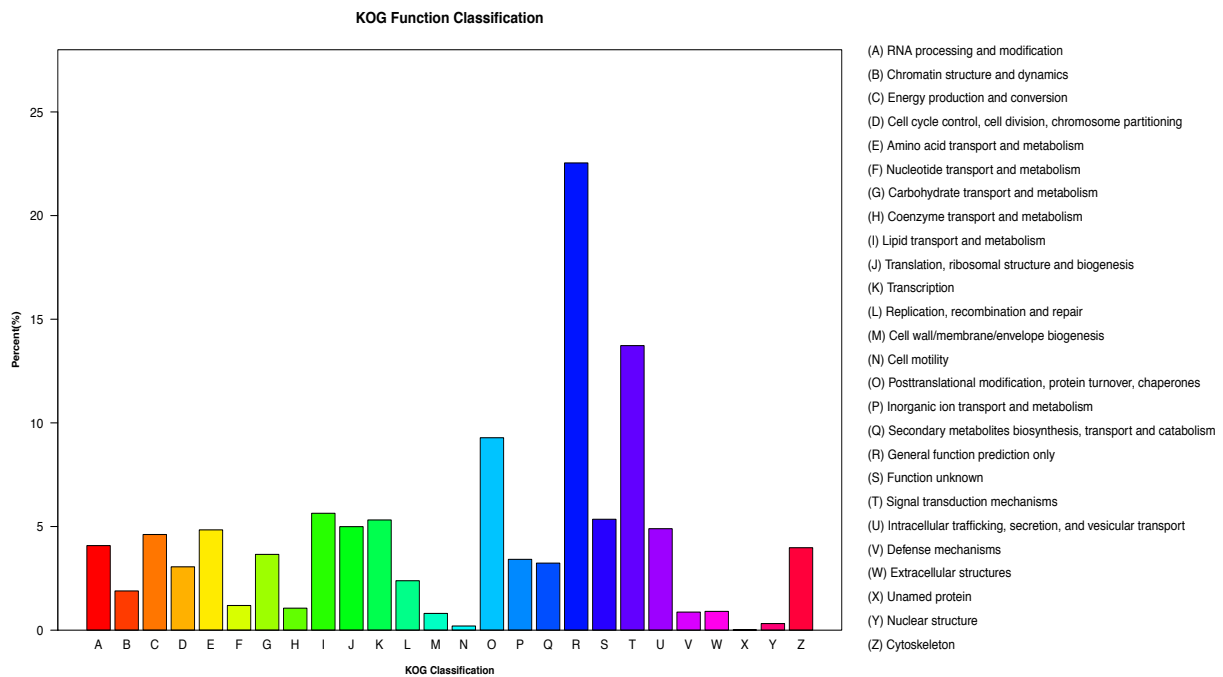

**Supplementary Figure S6.** KOG functional classification of *L. dispar* transcriptome. Y-axis represents percentage of unigenes enrichment and X-axis denotes different categories of KOG functional groups.

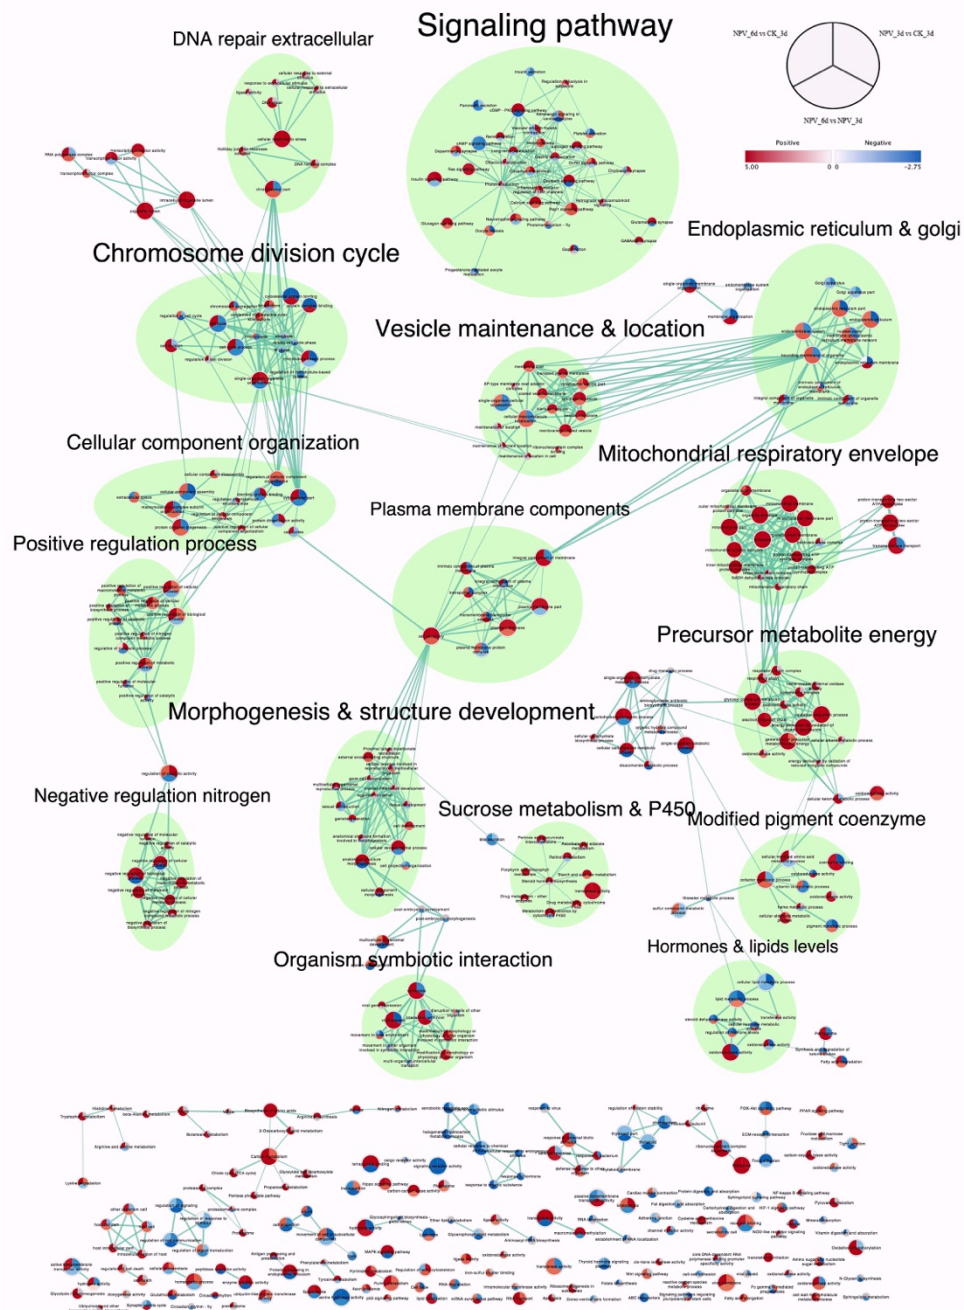

**Supplementary figure S7.** Complete enrichment Map visualization of the ranked GSEA results obtained for comparative analysis between each permutation of CK\_3d, NPV\_3d and NPV\_6d, clustered and annotated by auto-annotate plugin, font size of the cluster label is proportional to the size of the cluster. Each node represents enriched GO/KEGG term, node size signifying the number of genes involved and is divided into three parts representing each one to one comparison between samples as illustrated in legend, Node color gradient represents the normalized enrichment scores (NES). Thickness of edges represents the richness of shared genes between connected nodes.



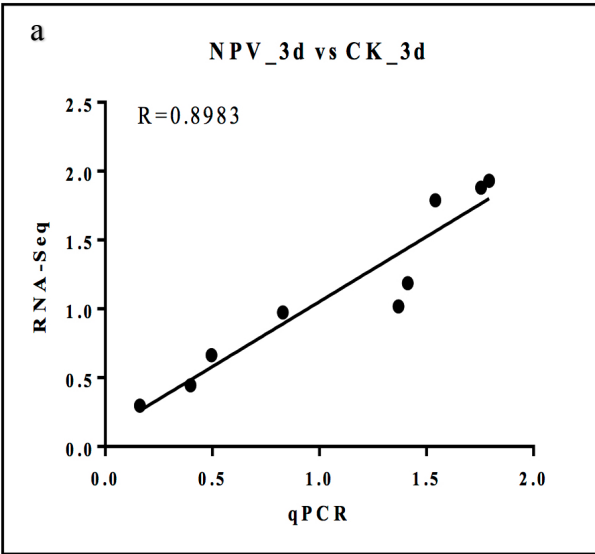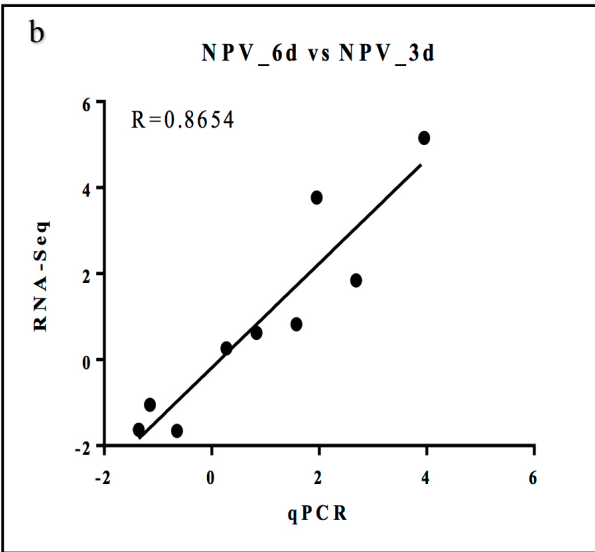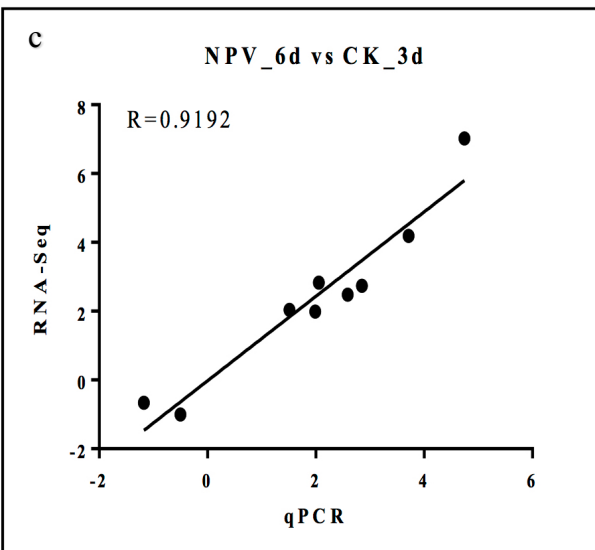

**Supplementary Figure S8.** Validation of RNA-Seq data analysis by RT-qPCR. The nine genes differentially expressed between CK\_3d, NPV\_3d and NPV\_6d in pairs were again tested with RT-qPCR. (a) NPV\_3d vs CK\_3d; (b) NPV\_6d vs NPV\_3d; (c) NPV\_6d vs CK\_3d. Overall, expression patterns showed consistency between the two methods.

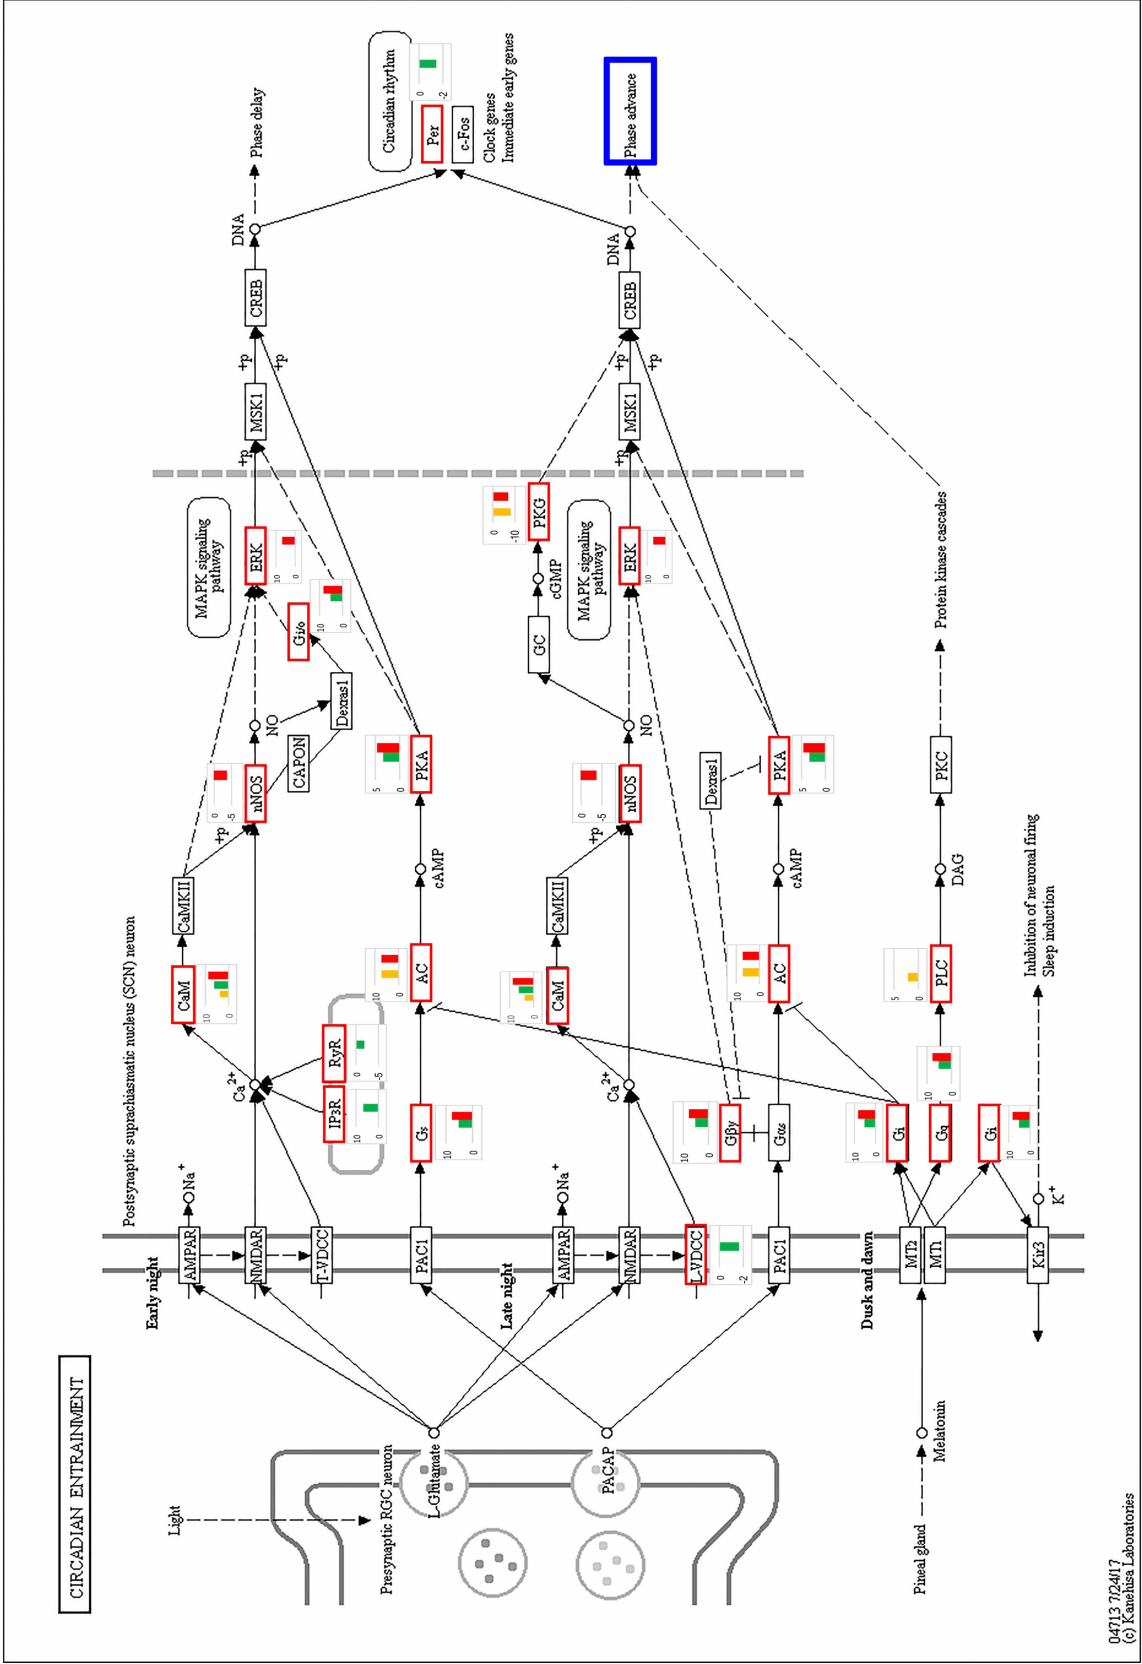

**Supplementary figure S9.** Circadian Entrainment pathway from KEGG database (<https://www.kegg.jp/kegg/pathway/map/map04713.html>), reference image; highlighting significantly differentially expressed genes. Nodes with red boxes are differentially expressed in pair wise comparison of samples, adjacent bar graph shows the expression pattern with column height representing the Log2FC, yellow column represents comparisons between NPV\_3d vs CK\_3d, green column for NPV\_6d vs NPV\_3d and red column for NPV\_6d vs CK\_3d. Phase advance of circadian cycle during treetop disease as seen our experiment is highlighted with blue boarder.
